# dialogi: Utilising NLP with chemical and disease similarities to drive the identification of Drug-Induced Liver Injury literature

Nicholas M Katritsis<sup>1,2</sup>, Anika Liu<sup>1,3</sup>, Gehad Youssef<sup>1</sup>, Sanjay Rathee<sup>1</sup>, Méabh MacMahon<sup>1,4</sup>, Woosung Hwang<sup>1</sup>, Lilly Wollman<sup>1</sup>, and Namshik Han<sup>1,5,\*</sup>

<sup>1</sup>Milner Therapeutics Institute, University of Cambridge, Cambridge, UK

<sup>2</sup>Department of Chemical Engineering and Biotechnology, University of Cambridge, Cambridge, UK

<sup>3</sup>Centre for Molecular Informatics, Department of Chemistry, University of Cambridge, Cambridge, UK

<sup>4</sup>Centre for Therapeutics Discovery, LifeArc, Stevenage, UK

<sup>5</sup>Cambridge Centre for AI in Medicine, University of Cambridge, Cambridge, UK

Correspondence\*:

Milner Therapeutics Institute, Jeffrey Cheah Biomedical Centre, University of Cambridge, Puddicombe Way, Cambridge, CB2 0AW, UK  
nh417@cam.ac.uk

## 2 ABSTRACT

3 Drug-Induced Liver Injury (DILI), despite its low occurrence rate, can cause severe side effects  
4 or even lead to death. Thus, it is one of the leading causes for terminating the development  
5 of new, and restricting the use of already-circulating, drugs. Moreover, its multifactorial nature,  
6 combined with a clinical presentation that often mimics other liver diseases, complicate the  
7 identification of DILI-related literature, which remains the main medium for sourcing results from  
8 the clinical practice and experimental studies. In this work—contributing to the ‘Literature AI for  
9 DILI Challenge’ of the Critical Assessment of Massive Data Analysis (CAMDA) 2021—we present  
10 an automated pipeline for distinguishing between DILI-positive and negative papers. We used  
11 Natural Language Processing (NLP) to filter out the uninformative parts of a text, and identify  
12 and extract mentions of chemicals and diseases. We combined that information with small-  
13 molecule and disease embeddings, which are capable of capturing chemical and disease  
14 similarities, to improve classification performance. The former are directly sourced from the  
15 Chemical Checker (CC). For the latter, we collected data that encode different aspects of disease  
16 similarity from the National Library of Medicine’s (NLM) Medical Subject Headings (MeSH)  
17 thesaurus and the Comparative Toxicogenomics Database (CTD). Following a similar procedure  
18 as the one used in the CC, vector representations for diseases were learnt and evaluated. Two  
19 Neural Network (NN) classifiers were developed: one that only accepts texts as input (baseline  
20 model) and an augmented classifier that also utilises chemical and disease embeddings  
21 (extended model). We trained, validated, and tested the models through a Nested Cross-  
22 Validation (NCV) scheme with 10 outer and 5 inner folds. During this, the baseline and extended  
23 models performed virtually identically, with macro  $F_1$ -scores of  $95.04 \pm 0.61\%$  and  $94.80 \pm 0.41\%$ ,  
24 respectively. Upon validation on an external, withheld, dataset, representing imbalanced  
25 data, the extended model achieved an  $F_1$ -score of  $91.14 \pm 1.62\%$ , outperforming its baseline  
26 counterpart, which got a lower score of  $88.30 \pm 2.44\%$ . We make further comparisons between  
27 the classifiers and discuss future improvements and directions, including utilising chemical and  
28 disease embeddings for visualisation and exploratory analysis of the DILI-positive literature.

29 **Keywords:** DILI, Drug Induced Liver Injury, NLP, Natural Language Processing, NN, Neural Network, Disease similarity, Drug similarity

## 1 INTRODUCTION

30 Drug-Induced Liver Injury (DILI) is a rare adverse drug reaction that can cause severe complications and,  
31 in some cases, may even prove fatal. The term is primarily used to signify the unexpected harm that a  
32 drug can cause to the liver. Virtually every class of medication can lead to hepatotoxicity, but the relative  
33 risk varies greatly between different drugs (David and Hamilton, 2010). For example, studies suggest  
34 that oral medications with doses higher than 50 mg/day and greater lipophilicity– thus those exhibiting  
35 higher hepatic metabolism– are more likely to cause DILI (Fontana, 2014; David and Hamilton, 2010).

36 Liver toxicity can be brought about in a predictable, dose-dependent, manner, when an individual is  
37 exposed to concentrations exceeding a drug’s toxicity threshold. This is known as intrinsic (or direct) DILI,  
38 has a relatively short latency period (hours to days), and is reproducible in animal models. The most often  
39 studied example of intrinsic DILI is acetaminophen (paracetamol), which accounts for about, or more  
40 than, half of acute liver failure (ALF) cases in the UK and USA (Katarey and Verma, 2016; Andrade  
41 et al., 2019). The majority of DILI cases, however, belong in the idiosyncratic (or indirect) variety,  
42 which, as the name suggests, cannot be solely explained by the drug in question. This type of DILI is  
43 instead driven by a mixture of characteristics that are unique to the individual and their environment,  
44 and tends to have a longer latency period following exposure (days to months) (Andrade et al., 2019).  
45 Idiosyncratic DILI is most prominently associated with antibiotics, and amoxicillin-clavulanate is the most  
46 commonly implicated drug in studies of European and American populations (Katarey and Verma, 2016).

47 Idiosyncratic DILI is, indeed, a rare occurrence, with two prospective population-based studies in France  
48 (Sgro et al., 2002) and Iceland (Björnsson et al., 2013) placing its crude annual incidence rate at 13.9 and  
49 19.1 cases per 100,000 people, respectively. A retrospective study of the UK-based General Practice  
50 Research Database (GPRD) (de Abajo et al., 2004) reports a lower rate of 2.4 cases per 100,000  
51 people, which is also in line with other studies from Sweden and the USA (Andrade et al., 2019).  
52 Out of those cases, an analysis of data coming from the Spanish DILI registry showed that about 4.2%  
53 progress to ALF (Robles-Diaz et al., 2014). This is in agreement with an incident rate of 1.02 cases per  
54 1,000,000 people, reported by another US-based study (Goldberg et al., 2015). Yet, despite its rarity, DILI  
55 remains one of the commonest reasons for the premature termination of drug development, while also  
56 affecting already-circulating drugs, often leading to withdrawal from the market, or issuing warnings and  
57 modifications of use (Katarey and Verma, 2016; Andrade et al., 2019). Therefore, the ability to reliably  
58 identify cases of DILI in the literature becomes critical, as such resources can aid both physicians in  
59 diagnosing the disease and researchers in, among other things, unravelling its mechanisms of action.

60 The identification of DILI-related literature is complicated by the heterogeneous and multifactorial  
61 nature of it. Typically, a drug causes hepatotoxicity directly, through its metabolites, and/or due to  
62 possible subsequent inflammatory reaction. However, factors including pre-existing liver pathology, such  
63 as Hepatitis B or C, or non-alcoholic fatty liver disease (NAFLD), and chronic alcohol consumption can  
64 increase an individual’s susceptibility to DILI. Similarly, genetic factors are at play; different cytochrome  
65 p450 enzyme phenotypes can lead to either decreased metabolism of toxic drugs or accelerated  
66 production of toxic intermediates, and human leukocyte antigen (HLA) polymorphisms may cause  
67 enhanced immune-mediated mechanisms. Furthermore, the clinical presentation of the disease is  
68 broad, with symptoms that often mimic other acute and chronic liver diseases, and, in the absence  
69 of diagnostic tests and biomarkers, diagnosis is primarily based on establishing a temporal association  
70 between drug exposure and symptom development, which is assessed alongside clinical history, liver  
71 biochemistry, imaging, and, in some cases, biopsy. (David and Hamilton, 2010; Katarey and Verma, 2016)

72 This complex landscape makes DILI identification a challenging task, with the application of text-mining  
73 techniques on DILI-related literature (Cañada et al., 2017; Wu et al., 2021) remaining relatively sparse.

74 This work presents a contribution to the ‘Literature AI for DILI Challenge’, which was part of the Critical  
75 Assessment of Massive Data Analysis (CAMDA) 2021 (<http://camda2021.bioinf.jku.at>).  
76 The aim of the challenge was to develop a classifier capable of identifying DILI-relevant papers. For that,  
77 we were given access to about 7,000 DILI-positive PubMed papers, referenced in the National Institutes  
78 of Health’s (NIH) LiverTox database (Hoofnagle et al., 2013), and a non-trivial reference dataset of  
79 around 7,000 DILI-negative papers. These originated from a larger collection of positive and negative  
80 corpora that was split in half to create a second dataset, similar in size with the one released (about  
81 14,000 texts in total), that was withheld and used for final performance testing. We refer to this as  
82 ‘external validation’ to distinguish it from the (internal) Nested Cross-Validation (NCV) that we perform.  
83 A second, smaller, but more challenging, external validation dataset of 2,000 papers was also provided.

84 We built an analysis pipeline that combines Natural Language Processing (NLP) with small-molecule  
85 and disease similarities. We pre-processed and normalised the texts to exclude uninformative words  
86 and allow for comparisons to be drawn across them. Within each text, chemical and disease terms  
87 were annotated and extracted. We treated those as external features and applied a framework that is  
88 capable of capturing their similarity. For chemicals, we acquired vectors (embeddings) directly from the  
89 Chemical Checker (CC) (Duran-Frigola et al., 2020). For diseases, we first collected data that encode  
90 the relations that exist between them. These were sourced from the National Library of Medicine’s  
91 (NLM) Medical Subject Headings (MeSH) thesaurus (<https://meshb.nlm.nih.gov/>) and the  
92 Comparative Toxicogenomics Database (CTD) (Davis et al., 2021). We then followed a similar procedure  
93 as the one used in the CC to learn vector representations for diseases. Since, typically, a text is associated  
94 with multiple terms, an average chemical- and disease-vector (external feature vector) was calculated  
95 and attached to it. These, together with the normalised texts, were fed into a Neural Network (NN)  
96 classifier. To prevent over-fitting during training, and to get an unbiased estimate of classification  
97 performance, we did hyperparameter tuning in a NCV scheme with 10 outer and 5 inner folds.  
98 During model evaluation, the extent to which external features alone are capable of distinguishing  
99 between the DILI-positive and negative texts was examined. Classifiers with and without the inclusion  
100 of external feature vectors were built and compared. During discussion, we explore drawbacks, point out  
101 future improvements, and focus on the potential impact of this work on facilitating DILI research.

## 2 METHODS

102 This analysis is split in three consecutive stages, with each being dependant on the output of the previous  
103 ones. First, title and abstract pairs (texts) were collected and processed. This stage constitutes the NLP  
104 pipeline, which can be further split in two steps: text pre-processing, and chemical and disease term  
105 (concepts) annotation. At the second stage, drug and disease embeddings were learnt, and an average  
106 drug- and disease-representation (external feature vector) was calculated for each text. Lastly, the NN  
107 classifiers were built, and then trained, validated, and tested in a NCV scheme. The project has been  
108 developed in Python 3.9.10 and bundled as a package, to provide ease of use and aid future development.

## 109 2.1 NLP pipeline

### 110 2.1.1 Text pre-processing

111 Titles and abstracts were first concatenated to form ‘full’ texts. These were then provided as input to  
112 the Stanza NLP package (Qi et al., 2020), which was initialised with its tokenisation, lemmatisation,  
113 and Part-of-Speech (POS) processors. Stanza provides two biomedical Universal Dependencies (UD)  
114 models that are pre-trained on human-annotated treebanks. For this analysis, we used the option that  
115 is based on the GENIA corpus (Kim et al., 2003), as it is built on top of 2,000 PubMed abstracts, and  
116 was therefore thought to be a better fit for the (also PubMed-sourced) texts that we had at our disposal.

117 Each text was split to sentences and then words, and each word was mapped to its base form (lemma).  
118 We filtered out lemmas that were not nouns, verbs, adjectives, or adverbs. A list of stopwords was compiled  
119 by merging those included in the spaCy package in Python, with the ones provided by PubMed (<https://pubmed.ncbi.nlm.nih.gov/help/#help-stopwords>). Subsequently, both stopwords and  
120 any lemmas that were less than 3 characters long were purged. As a result of those pre-processing steps,  
121 implicitly, the texts were also lowercase-normalised, and any numerals and punctuation marks were dropped.  
122

### 123 2.1.2 Concept annotation

124 We queried PubTator Central’s (Wei et al., 2019) RESTful API to acquire annotations for chemicals and  
125 diseases. The tool performs concept disambiguation, which resolves conflicts when overlapping annotations  
126 are found, and returns concepts normalised to their respective MeSH identifiers. We then counted the times  
127 each annotated term shows up within a text, and calculated and assigned (text-specific) relative frequencies  
128 to them. In the code, the ‘PubTator’ class is responsible for handling POST and GET requests to the server,  
129 processing the raw response data, and associating texts with annotated terms and their relative frequencies.  
130 At this step, raw, unchanged, texts were used as input. As a result, the annotations we got back were  
131 incompatible, and thus could not be utilised together, with the pre-processed texts of the previous section.

132 To resolve this issue, while also retaining clarity, the ‘UnivTextBlock’ class was implemented in the code.  
133 The class provides a method for exporting processed text, in the sense that pre-processing has been  
134 applied and concept terms have been normalised, either by replacement with their MeSH identifiers,  
135 or the broader concept category (that is, ‘disease’ or ‘chemical’). To handle cases where a concept  
136 term spans across multiple words, or is misaligned compared to the target word(s)– often the result  
137 of incorrect sentence segmentation or peculiarities in tokenisation– the code checks for degree of overlap.  
138 We observed good performance when demanding that the latter exceed a minimum threshold value of 90%.

## 139 2.2 External feature vector generation

### 140 2.2.1 Data collection

141 We aimed to quantify disease and, separately, chemical similarity. First, we collected data from the  
142 MeSH thesaurus. Descriptors and supplementary concept records were downloaded in XML format. At the  
143 uppermost level, there are 16 categories, which are further split in subcategories. Within each subcategory,  
144 descriptors are arranged in a hierarchical manner, from most general to most specific. This results in  
145 a branching, tree-like, structure. In the XML file, each descriptor is associated with one or multiple tree  
146 numbers, which represent paths taken from the root subcategory, until the descriptor in question is reached.

147 These data were parsed into a dictionary that associates descriptors with their respective tree numbers.  
148 We selected for disease-descriptors by pruning those, whose trees did not start with ‘C’, as category C is



149 for diseases. Similarly, for chemicals, we filtered out descriptors that did not fall under category D, which  
150 contains drugs and chemicals. Supplementary concept records are not associated with tree numbers. Instead,  
151 they are mapped onto one or multiple descriptors. We parsed these relationships in a separate dictionary,  
152 which we used to indirectly link supplementary concepts with the hierarchical structure described earlier.

153 We also collected data from the CTD, which associates diseases with chemicals, genes, pathways, and  
154 phenotypes. In this context, phenotypes refer to non-disease biological events and are expressed using  
155 the Gene Ontology (GO) as controlled vocabulary (Davis et al., 2021). As a result, disease-phenotype  
156 associations are further split into three datasets, one for each GO category: Biological Process (GO-BP),  
157 Cellular Component (GO-CC), and Molecular Function (GO-MF). In total, 6 datasets were downloaded  
158 from the CTD. Disease terms are expressed using MeSH identifiers and, thus, required no further processing.

### 159 2.2.2 Concept embedding learning

160 After data collection, a procedure matching the one followed in the CC was used. This was applied  
161 separately to each dataset and consists of three consecutive steps: (a) turning the dataset into a corpus,  
162 (b) learning a (sparse) vector representation on it, and (c) embedding the latter into a lower dimensional  
163 space. For the MeSH, concept terms are associated with tree numbers, which represent paths. We traversed  
164 these paths, starting from the root subcategory, and saved each location on the tree as a word. A corpus was,  
165 then, built by repeating this process for all terms. For the CTD, concept terms are linked together through  
166 interactions with chemicals, genes, etc. We created a corpus by treating these interacting partners as words.

167 Corpora were mapped to a sparse vector space by applying a term frequency–inverse document  
168 frequency (TF-IDF) transformation. Prior to that, frequent and infrequent words were dropped, that is,  
169 words associated with less than 5 or more than 80% of the terms. Following the transformation, any  
170 null (zero) vectors were purged, alongside with their corresponding terms. An initial dimensionality  
171 reduction step was performed by means of truncated Singular Value Decomposition (SVD). Here,  
172 we kept the number of components that explained around 90% of the variance seen in the original data.

173 For learning the final embeddings, we ran the node2vec algorithm (Grover and Leskovec, 2016), with its  
174 default parameters, on a term similarity network. This produced 128-dimensional vectors. To create the  
175 similarity network, we first used cosine similarities to identify each term’s neighbourhood, which consisted  
176 of its 100 closest neighbours. We approximated the null distribution empirically, by randomly sampling  
177 with replacement 100,000 pairs of terms and calculating their cosine similarities. This was used to map  
178 neighbour similarities to p-values. We built the network by merging the neighbourhoods together and  
179 assigning  $-\log_{10}(\text{p-values})$  as edge weights. We pruned any insignificant edges– that is, edges with  
180 weights less than, or equal to, 2– but demanded that each term be connected to at least 3 closest neighbours.

### 181 2.2.3 Chemical Checker embeddings

182 While chemical similarities from the CC need no further processing themselves, vectors are indexed  
183 by their InChIKeys. Since we normalise chemicals using MeSH identifiers, a mapping had to be  
184 created that would link the two. We queried ChemIDplus’s (<https://chem.nlm.nih.gov/chemidplus/>) API to retrieve MeSH terms and their respective InChIKeys and SMILES. We,  
185 then, used the MeSH thesaurus to associate MeSH identifiers with concepts and terms. However,  
186 a MeSH identifier usually points to multiple concepts– which typically consist of one or more  
187 synonymous terms– and sometimes more than one of those concepts or terms are associated with  
188 an InChIKey and/or SMILES. Therefore, to reliably translate from MeSH to InChIKeys, we also  
189 took into account the hierarchy of preferred concepts and terms that exists in the MeSH thesaurus.  
190

191 In an attempt to further expand the number of MeSH terms that are associated with an InChIKey,  
192 we extracted relevant associations from the DrugBank database (Wishart et al., 2018) and merged  
193 them with those associations sourced from ChemIDplus. Furthermore, in order to enrich any sparse  
194 CC spaces, we utilised the CC signaturisers (Bertoni et al., 2021) to predict embeddings for chemical  
195 compounds that are not included in the original database. Here, the SMILES structural information–  
196 which had been acquired from ChemIDplus in the previous step– were given as input to the signaturisers.

## 197 2.2.4 External feature vectors

### 198 2.2.4.1 Generation

199 At this stage, disease embeddings have been generated– seven vector spaces in total; six from the  
200 CTD and another one from the MeSH– and chemical signatures have been retrieved from the Chemical  
201 Checker (25 spaces, augmented with an additional one, generated from MeSH data). We first aimed  
202 to concatenate individual, concept-specific, spaces into one, so that diseases (and chemicals) were  
203 represented by a single vector space (and chemicals by a separate one). However, concatenation alone  
204 would not only lead to a considerable dimensionality difference between the resulting disease- and  
205 chemical-specific spaces (896 and 3,328 dimensions, respectively), but also potentially combine a great  
206 number of correlated features together, adding redundant dimensions to the produced space. Therefore,  
207 after concatenation, followed a dimensionality reduction step using truncated SVD. We have carefully  
208 tuned this process to retain as much information as possible, without introducing additional noise.

209 The vectors were not normalised or centred prior to concatenation and dimensionality reduction,  
210 as doing so, in this particular case, did not lead to significant differences. For diseases, we chose to  
211 concatenate the top two most dense CTD spaces (GO-BP and GO-MF, for rationale, see Results) and then  
212 performed truncated SVD to reduce them down to 103 dimensions, which explained about 90% of the  
213 original variance. Separately, we reduced the dimension of the MeSH space for diseases from 128 to 47  
214 dimensions, which also retained about 90% of the variance of the original data. We concatenated the two  
215 reduced spaces to form the final 150–dimensional disease space. In a similar manner, for chemicals,  
216 we concatenated all the CC spaces and reduced them down to 265 dimensions. The MeSH space  
217 for chemicals was also reduced to 35 dimensions. In both cases, about 80% of the original variance  
218 was explained. By concatenation, the final chemical space was produced, which is 300–dimensional.

219 At this point, a single disease-specific, and a second chemical-specific, space exists. These are by no  
220 means related to the texts, but instead encode similarities between the concepts that were extracted out of  
221 them earlier. In contrast, external feature vectors are meant to be text-specific and to capture the similarities  
222 between the texts, as these are encoded by the combinations of chemicals and diseases that show up in  
223 them. For each text, concept relative frequencies– already calculated during concept annotation– were  
224 used to calculate the weighted average for the disease embeddings and, separately, chemical embeddings.  
225 Concept embeddings that belong to terms mentioned infrequently within the text are, as a result, down-  
226 weighted, compared to those associated with more frequent terms. The two (now text- and concept-specific)  
227 vectors were first normalised to unity and then concatenated to form the final external feature vector.

### 228 2.2.4.2 Comparisons

229 For between-space comparisons, two measures were used: the Rank-Biased Overlap (RBO) (Webber et al.,  
230 2010), and Pearson correlation. The RBO is a top-weighted similarity measure, that can be applied to non-  
231 conjoint ranked lists of indefinite length. The measure models the behaviour of a user comparing between  
232 two lists incrementally, at increasing depths, where, at each depth, a fixed probability of stopping exists.

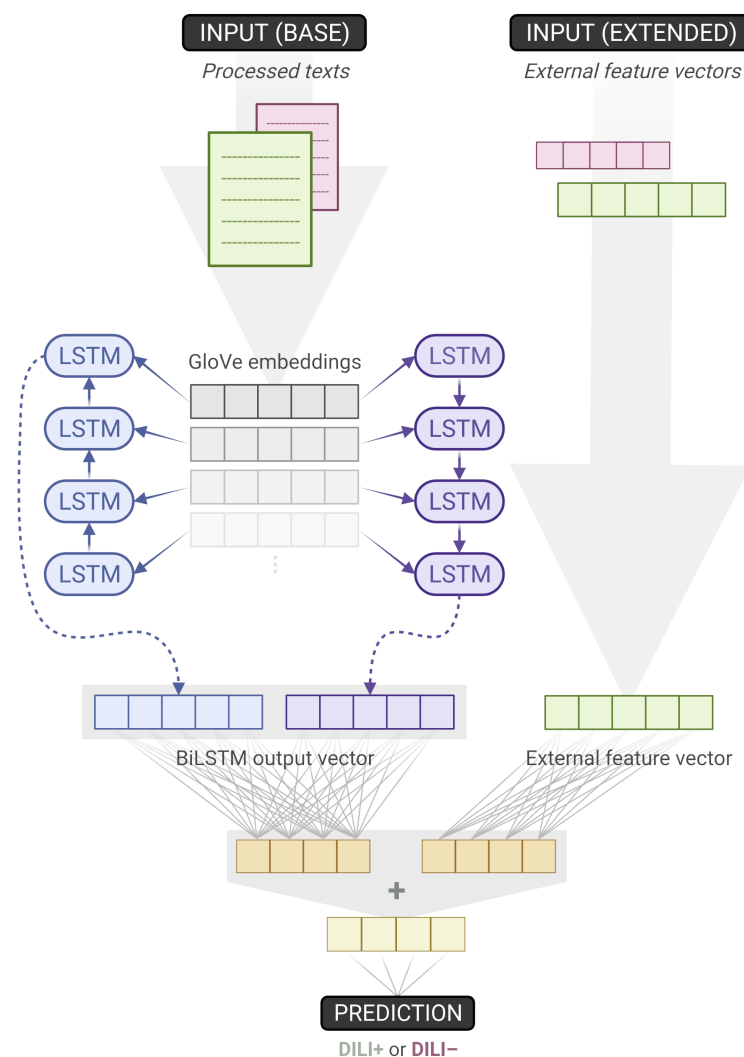

**Figure 1.** Overview of the baseline and extended classifiers. The former accepts texts as its single input, while the latter augments its baseline counterpart by also utilising external feature vectors. When training the baseline model, weights downstream the ‘base input’– on the left side of the figure– are learnt. As the extended model is built on top of the baseline, those weights can be transferred and frozen, thus remaining unchanged during training. As a result, for the extended model, only one dense layer’s weights have to be trained. (Created with BioRender.com)

233 To compare the similarity between two spaces, a procedure similar to the one described in the Chemical  
234 Checker was followed (Duran-Frigola et al., 2020). First, the common concepts between the two spaces  
235 were identified. Then, for each concept, we computed a list of its 100 closest neighbours. We used  
236 cosine similarities and returned lists that were ordered by decreasing similarity. The similarity search  
237 was performed efficiently using the Faiss library in Python (Johnson et al., 2017). The two ranked  
238 lists were used to calculate a RBO similarity score (we set  $p = 0.7$ , making the search more top-  
239 weighted). The process was repeated for all common concepts, the similarity scores were aggregated,  
240 and their average value was calculated. This was used as the RBO similarity score for the space-pair.

241 To calculate Pearson correlations, we applied Canonical Correlation Analysis (CCA) on space-pairs to  
242 find orthogonal linear combinations (canonical variables) of their features, that maximally correlate with  
243 each other. We kept the first three canonical variable pairs and, for each of them, calculated the Pearson  
244 correlation. By averaging those values together, the final space-pair correlation value was calculated.

### 245 **2.3 NN classifiers and validation**

246 We developed two NN classifiers. The baseline classifier accepts processed texts as its single input.  
247 The extended classifier augments the baseline model by additionally taking into account each text's  
248 external feature vector (Fig. 1). First, the texts are fed into an embedding layer, which has been initialised  
249 with GloVe vectors (Pennington et al., 2014). Then, these embeddings pass through a Bidirectional  
250 Long Short-Term Memory (BiLSTM) layer, which is followed by a dense layer with ReLU activation.  
251 An output dense layer with sigmoid activation is used to compute the classification probability value.

252 For the extended classifier, the external feature vectors first pass through a separate ReLU dense layer  
253 that is chosen to have the same number of units as the one mentioned earlier. Thus, the outputs of those two  
254 dense layers can be added together, before going through the same sigmoid output dense layer, as the one  
255 used in the baseline model. This design choice is intentional, it introduces no additional hyper-parameters  
256 to optimise, and allows for both the baseline and extended models to be trained and tested within the  
257 same NCV scheme. We trained the 10 outer-fold baseline models (which were inner-fold winners), froze  
258 their weights, augmented and transformed them to extended models, and then repeated the training one  
259 more time. As a result, for the extended model, just a single dense layer's weights needed to be trained.

260 During initial testing and tuning, it became apparent that using a Bi- instead of a Uni-LSTM layer,  
261 and allowing for the text embeddings to be trainable, consistently led to better performing models. Therefore,  
262 we did not optimise for those parameters. Nonetheless, hyper-parameter tuning was applied within a  
263 NCV scheme with 10 outer and 5 inner folds. We varied the embedding dimension ([50, 100, 200, 300]),  
264 UniLSTM units (32 – 96, with a step size of 16), dense layer units (192 – 320, with a step size of 32),  
265 and the learning rate ([ $10^{-3}$ ,  $5 \times 10^{-3}$ ,  $7 \times 10^{-3}$ ,  $10^{-2}$ ]). During model training, we used a batch size  
266 of 32, and the Adam optimiser with binary cross-entropy as the loss function. For hyper-parameter tuning,  
267 we monitored validation loss. When training the extended model, a fixed learning rate of  $10^{-2}$  was used.

268 Additionally, we observed that the models learn rapidly, and usually start to overfit within the first 10  
269 epochs, even with dropout and L1/L2 regularisation applied appropriately to the LSTM and dense layers.  
270 In fact, training for just one epoch tended to produce models performing similarly, or better, than those  
271 trained for longer. Thus, we chose to train for no more than one epoch. In this case, regularisation does  
272 not improve performance, and is thus omitted (Komatsuzaki, 2019). We use Keras and the Bayesian  
273 optimisation algorithm in KerasTuner to build, train, and validate the NN classifiers, and to perform  
274 hyper-parameter optimisation. To support NCV, the original KerasTuner code was subclassed and extended.  
275 We generate stratified k-folds through Scikit-learn's (Pedregosa et al., 2012) 'StratifiedKFold' function.

## 3 RESULTS

### 276 **3.1 Concept embeddings**

277 We first examined the degree of term coverage for the different concept spaces (Fig. 2A). Chemical and  
278 disease terms found in the texts have already been extracted and collected. However, there are terms missing  
279 in some of the spaces. This is either due to the term not being present in the data that was used to construct  
280 the spaces in the first place, or a result of the TF-IDF word filtering steps that were applied afterwards.



281 Missing terms are represented as null vectors. For diseases, MeSH is the most enriched space (96%  
282 coverage), followed by the CTD's GO-BP and GO-MF (coverage of 78% and 73%, respectively). Since  
283 we normalise terms to the MeSH vocabulary, the MeSH space is expected to be the most enriched.

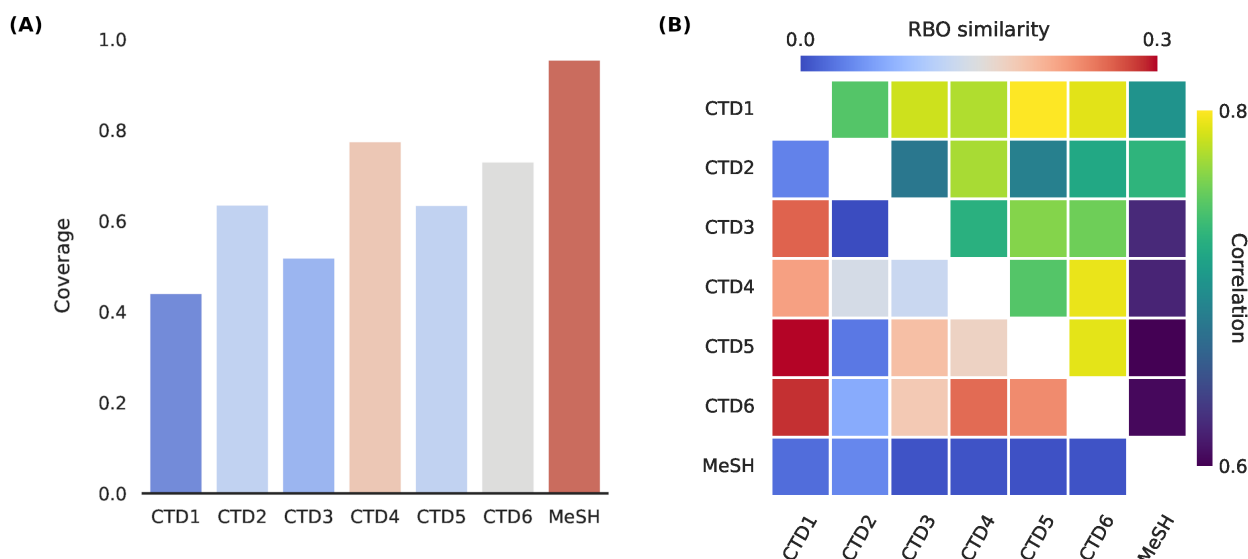

**Figure 2.** CTD1-6: Genes, Chemicals, Pathways, GO-BP (Biological Process), GO-CC (Cellular Component), and GO-MF (Molecular Function). (A) Disease term coverage for the 6 CTD (Comparative Toxicogenomics Database) spaces, and MeSH. The latter, together with GO-BP and GO-MF, are the most enriched spaces, encoding about 96%, 78%, and 73%, respectively, of all the disease terms found in text. (B) RBO (Rank-Biased Overlap) similarities and Pearson correlations between the different disease spaces. Although the two are not directly comparable, they seem to be in good agreement with each other, with MeSH being the least, and CTD1 (Genes) the highest correlated space, in general.

284 For chemicals, the CC spaces appear to be equally enriched, with a coverage of about 60%. The MeSH  
285 space for diseases has a higher coverage of 84%. The uniformity that is observed across the different  
286 CC spaces can be attributed to, and also supports, the usage of the CC signaturisers. These fill in  
287 the gaps of missing molecular signatures; typically, CC spaces tend to differ considerably in terms  
288 of their sizes (Duran-Frigola et al., 2020). Notably, a concept space with lower term coverage does  
289 not necessarily translate to external feature vectors with reduced text coverage. The latter are (text-  
290 specific) linear combinations of concept vectors, and the coverage of that space is, thus, also affected  
291 by the combination of terms that show up in each particular text, as well as their relative frequencies.

292 We then calculated the RBO similarity measures and Pearson correlations across the different pairs  
293 of disease spaces (Fig. 2B). The two measures are in good agreement with each other. As expected,  
294 given that the rest of the spaces are based on the CTD-sourced datasets, the MeSH space tends  
295 to be the most dissimilar one, followed by the CTD's Chemicals space. On the other end, CTD  
296 Genes is highly correlated with most other CTD spaces. We created similar plots to compare  
297 between the chemical spaces and, for the CC spaces, observed a similarity and correlation profile  
298 that matched the one provided and discussed in the original publication (Duran-Frigola et al., 2020).

299 We utilised both coverages and correlations when selecting for the disease spaces and, separately,  
300 chemical spaces, to concatenate. For diseases, we chose the top three enriched spaces (MeSH, and CTD

301 GO-BP and GO-MF). When seen as a group, these are strongly correlated with the rest of the CTD spaces.  
302 We chose to concatenate all chemical spaces together. The premise here is that concatenation between  
303 spaces with largely different term coverages might introduce unwanted noise later, during the dimensionality  
304 reduction step (see Methods). This is of concern for diseases, where coverage ranges from as low as 44% to  
305 a highest score of 96%, but not for chemicals, where it remains virtually unchanged across the CC spaces.

### 306 **3.2 External feature vectors**

307 We were also interested in assessing the extent to which the external feature vectors are capable of  
308 capturing the differences between DILI positive and negative texts. Ability to do so, at this stage, would  
309 provide strong evidence of their suitability to be used as additional inputs to the (extended) classifier.  
310 First, we normalised the vectors, performed Principal Component Analysis (PCA), and kept the first 15  
311 components. We, then, produced a 3D t-SNE plot (Fig. 3). Throughout this work, as is usual in NLP, we are  
312 working with cosine similarities. However, cosine distances are not invariant to mean-centring– which  
313 PCA explicitly performs– and will be affected and distorted. In contrast, euclidean distances are mean-  
314 centring invariant. By normalising the data first, we enforce a monotonic relationship between cosine and  
315 euclidean distances, which we exploit by using euclidean distances in the t-SNE plot (Korenus et al., 2007).

316 In the plot (Fig. 3), a good degree of separation can be observed between the DILI positive and negative  
317 samples. Positive texts tend to cluster in the upper-right, and also form a tight cluster in the lower-left, corner.  
318 Between those, both positive and negative texts reside, forming largely overlapping clusters. It should be  
319 pointed out that concept vectors were learnt completely separately from, and are in no way connected with,  
320 the classification of texts in the two classes. As such, the acceptable clustering performance seen here should  
321 be attributed in: (a) similar chemicals and/or diseases appearing within each class, (b) dissimilar chemicals  
322 and/or diseases appearing between classes, (c) unique chemical, disease, and chemical-disease combinations  
323 dominating in each class. This might be worth further investigation, but, for now, makes an appealing  
324 case for the usefulness of the external feature vectors as a means for improving classification performance.

### 325 **3.3 Classification performance**

326 We compared between the baseline classifier, which uses texts as its sole input, and the extended  
327 one, that also accepts external feature vectors. As we are interested in the balance between precision  
328 and recall, we used the  $F_1$ -score as performance measure. During internal validation, macro  $F_1$ -score  
329 (average of per-class scores) was calculated. For external validation, micro scores (calculated over the  
330 entirety of the predictions, irrespective of classes) are reported. During initial tuning and testing, we  
331 observed that the baseline model performs optimally with the usual classification threshold of 0.5, but,  
332 for the extended model, a higher threshold of about 0.7 leads to unchanged, or improved, performance,  
333 depending on the validation dataset used. We set these, seemingly arbitrary, thresholds at the beginning  
334 of the NCV procedure and evaluated their suitability afterwards. Alternatively, a more elegant approach  
335 would treat the classification threshold as a hyper-parameter to be optimised in the inner NCV folds.

336 We plotted the average performance across the 10 outer folds (Fig. 4). During internal validation,  
337 the baseline and extended models performed virtually identically, with  $F_1$ -scores of  $95.04 \pm 0.61\%$  and  
338  $94.80 \pm 0.41\%$ , respectively. Evaluating the models on the first external dataset, which represents balanced  
339 data, painted a similar picture; this also provides proof that the training procedure we utilise does not  
340 lead to overfitting. In this case, baseline and extended models achieved scores of  $95.11 \pm 0.34\%$  and  
341  $94.93 \pm 0.48\%$ , respectively. We observed a drop in performance, which affected both models, when testing  
342 on the second external dataset, that represents imbalanced data. However, the extended model managed

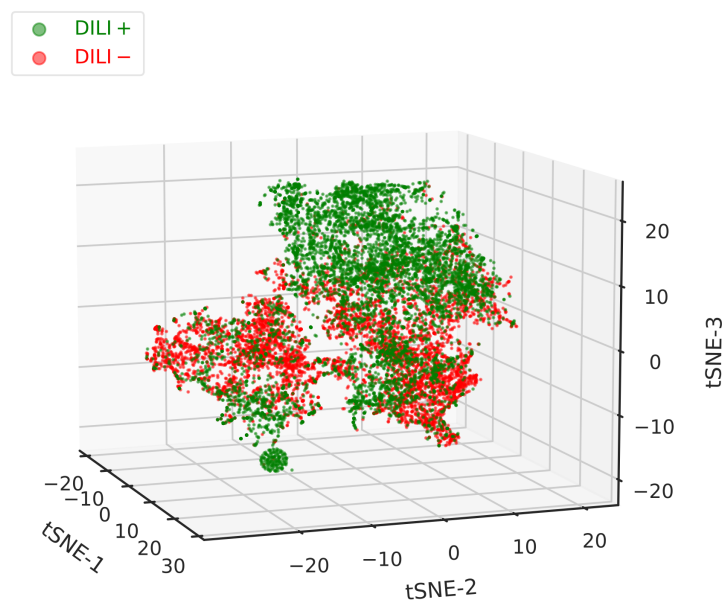

**Figure 3.** 3D t-SNE plot of all the non-zero external feature vectors (which combine both chemical and disease embeddings). A good degree of separation can be observed between the DILI positive and negative texts, with the former clustering cleanly on the top-right corner of the plot. A second dense cluster is formed at the bottom-left corner. Between them, in the middle part of the plot, reside both positive and negative texts, that did not form distinct clusters. While feature vectors can improve classification performance, they tend to be sparse, and should, therefore, not be used as the single input to the classifier.

343 to outperform the baseline model by a considerable margin; the former achieved an  $F_1$ -score of  $91.14 \pm$   
344  $1.62\%$ , compared to the baseline's  $88.30 \pm 2.44\%$ . The extended classifier also seems to produce lower  
345 dispersed scores, which becomes especially pronounced during the second phase of external validation.

346 Lastly, we evaluated the choice of threshold for the two classifiers. Within each outer fold, we varied  
347 the threshold between 0.5 and 0.95 and calculated the (macro)  $F_1$ -scores (Fig. 5). When compared at  
348 the same classification threshold, the extended model consistently outperforms its baseline counterpart  
349 by a small margin, at thresholds closer to 0.5, which incrementally grows larger at higher thresholds.  
350 This implies a difference between the slopes of the two curves which is, indeed, there to be seen:  
351 the baseline curve is steeper at each threshold value, compared to the extended one. The inclusion  
352 of the external feature vectors has resulted in the extended classifier being more confident in its  
353 predictions, which is reflected in the probability scores being pushed closer to the limit points  
354 of the  $[0, 1]$  interval (and a lower binary cross-entropy validation loss, too). It is desirable to set the  
355 threshold to a higher value, as doing so can improve— sometimes considerably— the classification  
356 performance on the imbalanced external dataset. Higher thresholds, however, might hurt the performance  
357 on the balanced validation datasets. For the extended model, choosing a threshold in the range  
358 of 0.5 – 0.7 leads to a virtually unchanged  $F_1$ -scores, a behaviour not followed by the baseline  
359 model. With this in mind, the choice of thresholds for the two classifiers seems to be near-optimal.

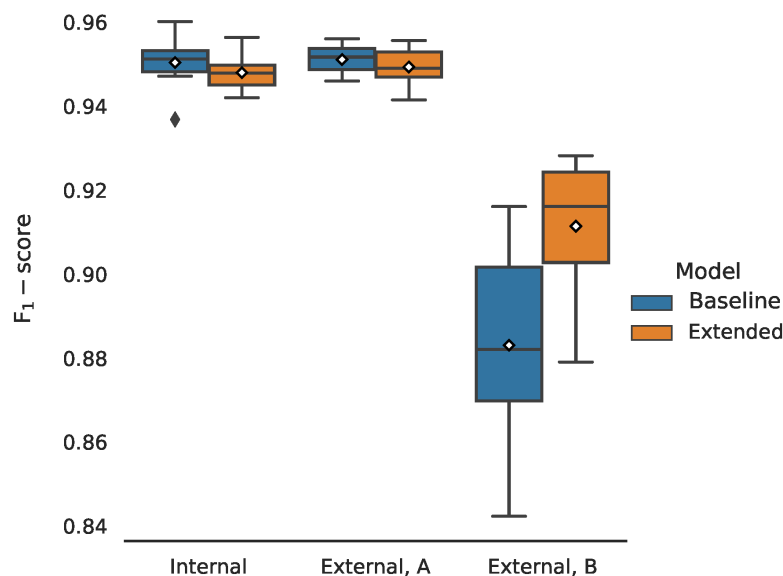

**Figure 4.** Classification performance comparison between the two models, for different validation datasets. The performance across 10 folds is being reported. Mean values are annotated with white diamonds. Both models perform virtually identically during internal validation (macro  $F_1$ -scores of  $95.04 \pm 0.61\%$  and  $94.80 \pm 0.41\%$ , respectively), and equally well when tested on the first external dataset (micro  $F_1$ -score of  $95.11 \pm 0.34\%$  and  $94.93 \pm 0.48\%$ , respectively). The models are not overfitting. There is a significant drop in performance when testing on the second external dataset (which simulates imbalanced data). However, the extended model performs considerably better, with a (micro)  $F_1$ -score of  $91.14 \pm 1.62\%$ , compared to the baseline's  $88.30 \pm 2.44\%$ .

## 4 DISCUSSION

360 Word embeddings learnt directly on DILI-related (or other biomedical) literature cannot capture the  
361 similarities between diseases and chemicals. GloVe embeddings, for example, encode linguistic and/or  
362 semantic similarities of words by taking into account co-occurrences. However, there are no semantics to  
363 be encoded when it comes to chemical names or diseases in regular text. Of course, chemical (and disease)  
364 terms can still be similar, and this similarity could still be expressed in terms of co-occurrences, but instead  
365 of words in regular text, one would use common protein targets, gene pathways, indications, etc., to  
366 acquire meaningful relations. This is the rationale behind the usage of concept embeddings in this work.

367 Concept embeddings, turned into text-specific external feature vectors, however, present a challenge  
368 when utilised alone for classification. For the DILI-positive class, 93% and 86% of the texts have been  
369 annotated with at least one disease and chemical term, respectively. In the negative class, these percentages  
370 shrink down to 78%, for diseases, and 56%, for chemicals. The lack of annotated concept terms can  
371 be attributed to: (a) failure to annotate terms that exist in the text (false negatives), or (b) genuine lack  
372 of terms (true negatives), or (c) lack of terms in the title and/or abstract, but presence in the full text  
373 (true negatives in the context of the challenge, but false negatives in the broader sense). Because of the  
374 first and last points, filtering out texts with no annotated concepts as DILI-negative would be problematic.  
375 Instead, combining concept with word embeddings enables the classifier to make informed decisions, even  
376 when no chemicals or disease terms have been identified. Then, acquiring full texts when no concept  
377 terms are included in the title and abstract, could have the potential to improve classification performance.

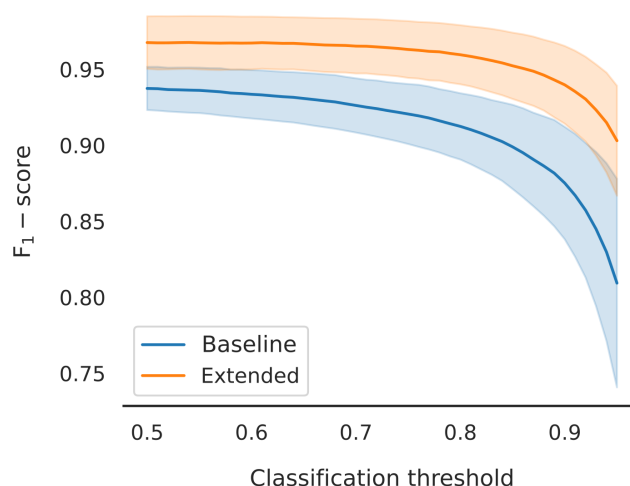

**Figure 5.** Macro  $F_1$ -score as a function of classification threshold, varied in the domain of  $[0.5, 0.95]$ . Mean values and standard deviations are plotted. The extended model outperforms the baseline at every threshold value. There is a clear difference in slope, with the baseline curve being steeper throughout the domain. Learning from the external feature vectors has pushed the extended model to be more confident in its predictions. In turn, using the same threshold for both models will lead to (at least) one of them under-performing. A higher threshold tends to improve the performance of the models on imbalanced data.

378 The additional information that we either generate, or collect, about disease, chemical, and text similarity  
379 can also prove valuable for the purposes of visualisation and exploratory analysis. Similar to the t-SNE plot  
380 that we provide in this study (Fig. 3), texts could be further clustered together based on the combination of  
381 chemicals or, alternatively, diseases that occur therein— a process that inherently takes into account concept  
382 similarities, too. Alternatively, average chemical similarities could be calculated against drugs that are  
383 already known to cause DILI, for example with the help of the DILIRank dataset (Chen et al., 2016). These  
384 could then be used to rank DILI-positive texts from most (high similarity to known DILI-related drugs)  
385 to less promising, as well as annotate them separately on the t-SNE plot, so that their neighbourhoods  
386 can be identified and further explored. This is one of the most exciting future prospects of this work.

387 Overall, in this study, we have demonstrated that utilising disease and chemical embeddings,  
388 alongside a typical NLP pipeline, has the potential to considerably improve classification performance.  
389 On external validation, the best performing classifier achieved an average  $F_1$ -score of  $94.93 \pm 0.48\%$ , on  
390 balanced data, and of  $91.14 \pm 1.62\%$ , on the dataset representing the imbalanced case. The classifiers'  
391 performance on the latter was tuned with threshold moving and evaluated to showcase that the  
392 inclusion of the external features leads to improved and more consistent performance. We also  
393 demonstrated the capability of the concept embeddings alone to distinguish between the positive and  
394 negative literature and discussed their potential usefulness for visualisation and exploratory purposes.

## CONFLICT OF INTEREST STATEMENT

395 A.L. is funded by GlaxoSmithKline (GSK). S.R. is funded by JW Pharmaceutical. M.M. is an employee  
396 of LifeArc. W.H. and N.H. are funded by LifeArc. N.H. is a co-founder of KURE.ai and CardiaTec  
397 Biosciences, and an advisor at Biorelate, Promatix, Standigm, and VeraVerse.



## AUTHOR CONTRIBUTIONS

398 N.M.K. conceived and designed the study, performed the analysis, collected data, and wrote the manuscript.  
399 A.L., G.Y., S.R., M.M., W.H., and L.W. contributed expertise and analysis tools. N.H. supervised the project.

## FUNDING

400 N.M.K. is funded by the George and Marie Vergottis Foundation and the Cambridge European Trust.  
401 A.L. is funded by GlaxoSmithKline (GSK). S.R. is funded by JW Pharmaceutical. W.H. and N.H. are  
402 funded by LifeArc.

## DATA AVAILABILITY STATEMENT

403 The code and datasets (directly uploaded or with links to the original sources) used in this study can be found  
404 on the GitHub repository: <https://github.com/pokedthefrog/camda2021-dialogi>

## REFERENCES

- 405 Andrade, R. J., Chalasani, N., Björnsson, E. S., Suzuki, A., Kullak-Ublick, G. A., Watkins, P. B., et al.  
406 (2019). Drug-induced liver injury. *Nat Rev Dis Primers* 5, 58. doi:10.1038/s41572-019-0105-0
- 407 Bertoni, M., Duran-Frigola, M., Badia-I-Mompel, P., Pauls, E., Orozco-Ruiz, M., Guitart-Pla, O., et al.  
408 (2021). Bioactivity descriptors for uncharacterized chemical compounds. *Nat. Commun.* 12, 3932.  
409 doi:10.1038/s41467-021-24150-4
- 410 Björnsson, E. S., Bergmann, O. M., Björnsson, H. K., Kvaran, R. B., and Olafsson, S. (2013). Incidence,  
411 presentation, and outcomes in patients with drug-induced liver injury in the general population of iceland.  
412 *Gastroenterology* 144, 1419–25, 1425.e1–3; quiz e19–20. doi:10.1053/j.gastro.2013.02.006
- 413 Cañada, A., Capella-Gutierrez, S., Rabal, O., Oyarzabal, J., Valencia, A., and Krallinger, M. (2017).  
414 LimTox: a web tool for applied text mining of adverse event and toxicity associations of compounds,  
415 drugs and genes. *Nucleic Acids Res.* 45, W484–W489. doi:10.1093/nar/gkx462
- 416 Chen, M., Suzuki, A., Thakkar, S., Yu, K., Hu, C., and Tong, W. (2016). DILrank: the largest reference  
417 drug list ranked by the risk for developing drug-induced liver injury in humans. *Drug Discov. Today* 21,  
418 648–653. doi:10.1016/j.drudis.2016.02.015
- 419 David, S. and Hamilton, J. P. (2010). Drug-induced liver injury. *US Gastroenterol. Hepatol. Rev.* 6, 73–80
- 420 Davis, A. P., Grondin, C. J., Johnson, R. J., Sciaky, D., Wieggers, J., Wieggers, T. C., et al. (2021).  
421 Comparative toxicogenomics database (CTD): update 2021. *Nucleic Acids Res.* 49, D1138–D1143.  
422 doi:10.1093/nar/gkaa891
- 423 de Abajo, F. J., Montero, D., Madurga, M., and García Rodríguez, L. A. (2004). Acute and clinically  
424 relevant drug-induced liver injury: a population based case-control study. *Br. J. Clin. Pharmacol.* 58,  
425 71–80. doi:10.1111/j.1365-2125.2004.02133.x
- 426 Duran-Frigola, M., Pauls, E., Guitart-Pla, O., Bertoni, M., Alcalde, V., Amat, D., et al. (2020). Extending  
427 the small-molecule similarity principle to all levels of biology with the chemical checker. *Nat. Biotechnol.*  
428 38, 1087–1096. doi:10.1038/s41587-020-0502-7
- 429 Fontana, R. J. (2014). Pathogenesis of idiosyncratic drug-induced liver injury and clinical perspectives.  
430 *Gastroenterology* 146, 914–928. doi:10.1053/j.gastro.2013.12.032
- 431 Goldberg, D. S., Forde, K. A., Carbonari, D. M., Lewis, J. D., Leidl, K. B. F., Reddy, K. R., et al.  
432 (2015). Population-representative incidence of drug-induced acute liver failure based on an analysis of  
433 an integrated health care system. *Gastroenterology* 148, 1353–61.e3. doi:10.1053/j.gastro.2015.02.050

- 434 Grover, A. and Leskovec, J. (2016). node2vec: Scalable feature learning for networks
- 435 Hoofnagle, J. H., Serrano, J., Knobon, J. E., and Navarro, V. J. (2013). LiverTox: a website on drug-induced
- 436 liver injury. *Hepatology* 57, 873–874. doi:10.1002/hep.26175
- 437 Johnson, J., Douze, M., and Jégou, H. (2017). Billion-scale similarity search with GPUs
- 438 Katarey, D. and Verma, S. (2016). Drug-induced liver injury. *Clin. Med.* 16, s104–s109. doi:10.7861/
- 439 clinmedicine.16-6-s104
- 440 Kim, J.-D., Ohta, T., Tateisi, Y., and Tsujii, J. (2003). GENIA corpus—semantically annotated corpus for
- 441 bio-textmining. *Bioinformatics* 19 Suppl 1, i180–2. doi:10.1093/bioinformatics/btg1023
- 442 Komatsuzaki, A. (2019). One epoch is all you need
- 443 Korenius, T., Laurikkala, J., and Juhola, M. (2007). On principal component analysis, cosine and euclidean
- 444 measures in information retrieval. *Inf. Sci.* 177, 4893–4905. doi:10.1016/j.ins.2007.05.027
- 445 Pedregosa, F., Varoquaux, G., Gramfort, A., Michel, V., Thirion, B., Grisel, O., et al. (2012). Scikit-learn:
- 446 Machine learning in python
- 447 Pennington, J., Socher, R., and Manning, C. (2014). GloVe: Global vectors for word representation. In
- 448 *Proceedings of the 2014 Conference on Empirical Methods in Natural Language Processing (EMNLP)*
- 449 (Doha, Qatar: Association for Computational Linguistics), 1532–1543. doi:10.3115/v1/D14-1162
- 450 Qi, P., Zhang, Y., Zhang, Y., Bolton, J., and Manning, C. D. (2020). Stanza: A python natural language
- 451 processing toolkit for many human languages
- 452 Robles-Diaz, M., Lucena, M. I., Kaplowitz, N., Stephens, C., Medina-Cáliz, I., González-Jimenez, A., et al.
- 453 (2014). Use of hy’s law and a new composite algorithm to predict acute liver failure in patients with
- 454 drug-induced liver injury. *Gastroenterology* 147, 109–118.e5. doi:10.1053/j.gastro.2014.03.050
- 455 Sgro, C., Clinard, F., Ouazir, K., Chanay, H., Allard, C., Guilleminet, C., et al. (2002). Incidence of
- 456 drug-induced hepatic injuries: a french population-based study. *Hepatology* 36, 451–455. doi:10.1053/
- 457 jhep.2002.34857
- 458 Webber, W., Moffat, A., and Zobel, J. (2010). A similarity measure for indefinite rankings. *ACM Trans.*
- 459 *Inf. Syst. Secur.* 28, 1–38. doi:10.1145/1852102.1852106
- 460 Wei, C.-H., Allot, A., Leaman, R., and Lu, Z. (2019). PubTator central: automated concept annotation for
- 461 biomedical full text articles. *Nucleic Acids Res.* 47, W587–W593. doi:10.1093/nar/gkz389
- 462 Wishart, D. S., Feunang, Y. D., Guo, A. C., Lo, E. J., Marcu, A., Grant, J. R., et al. (2018). DrugBank
- 463 5.0: a major update to the DrugBank database for 2018. *Nucleic Acids Res.* 46, D1074–D1082.
- 464 doi:10.1093/nar/gkx1037
- 465 Wu, Y., Liu, Z., Wu, L., Chen, M., and Tong, W. (2021). BERT-Based natural language processing of drug
- 466 labeling documents: A case study for classifying Drug-Induced liver injury risk. *Front Artif Intell* 4,
- 467 729834. doi:10.3389/frai.2021.729834
